# Supplementary material
Source: publisher site journal article supplement (https://www.dovepress.com/article/465780)
Supplement: Supplementary file 1 [file get_supplementary_file.php]

# Supplementary Data

**Fig S1** Survive rate of each group after tMCAO or sham operation

| Group (n=26) | Sham | tMCAO | EtOH+tMCAO | LPS+tMCAO | EtOH+tMCAO+TAK-242 |
| --- | --- | --- | --- | --- | --- |
| Survive rate(%) | 96.1 | 80.8 | 65.4 | 61.5 | 76.9 |

**Fig S2** Relative TLR4 repression and cell viability after treatment with a serious concentration of LPS


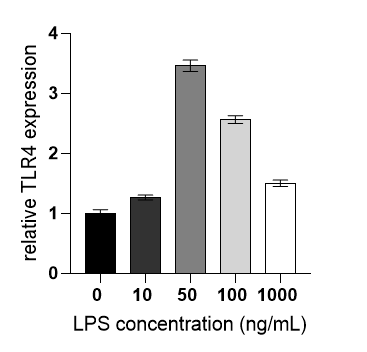

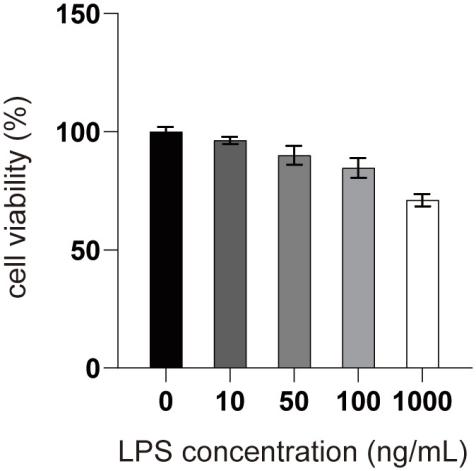


Cell Counting Kit-8 was used to determine cell viability followed by the manufacture’s instruction (Beyotime, China, C0037). The absorbance was then detected at 450 nm using a microplate reader.
